# Supplementary material for: Anesthetic action on the transmission delay between cortex and thalamus explains the beta-buzz observed under propofol anesthesia
Source: PubMed Central journal article supplement (PMC5473556; doi:10.1371/journal.pone.0179286), 2017-06-16
Supplement: pone.0179286.s003.pdf [file pone.0179286.s003.pdf]

## S1 Appendix. Theoretical power spectrum.

The solution of

$$\hat{\mathbf{L}}(\partial/\partial t)\mathbf{Y}(t) = \mathbf{A}\mathbf{Y}(t) + \mathbf{B}\mathbf{Y}(t - \tau_{TC}) + \mathbf{C}\mathbf{Y}(t - \tau_{CT}) + \boldsymbol{\xi}(t), \quad (1)$$

for  $t \rightarrow \infty$  is

$$\mathbf{Y}(t) = \int_{-\infty}^{\infty} \mathbf{G}(t - t')\boldsymbol{\xi}(t')dt', \quad (2)$$

with the matrix Green's function  $\mathbf{G} \in \mathbb{R}^{N \times N}$ . Substituting Eq (2) into Eq (1) leads to

$$\hat{\mathbf{L}}(\partial/\partial t)\mathbf{G}(t) = \mathbf{A}\mathbf{G}(t) + \mathbf{B}\mathbf{G}(t - \tau_{TC}) + \mathbf{C}\mathbf{G}(t - \tau_{CT}) + \mathbf{1}\delta(t), \quad (3)$$

with the unitary matrix  $\mathbf{1} \in \mathbb{R}^{N \times N}$ . Applying the Fourier transform

$$\mathbf{G}(t) = \frac{1}{\sqrt{2\pi}} \int_{-\infty}^{\infty} \tilde{\mathbf{G}}(\omega)e^{i\omega t}d\omega, \quad (4)$$

yields

$$\tilde{\mathbf{G}}(\omega) = \frac{1}{\sqrt{2\pi}} [\mathbf{L}(\omega) - \mathbf{A} - \mathbf{B}e^{-i\omega\tau_{TC}} - \mathbf{C}e^{-i\omega\tau_{CT}}]^{-1}. \quad (5)$$

The power spectral density matrix  $\mathbf{P}(\omega)$  of  $\mathbf{Y}(t)$  is the Fourier transform of the auto-correlation function matrix  $\langle \mathbf{Y}(t)^t \mathbf{Y}(t - T) \rangle$  (Wiener-Khinchine Theorem) leading to

$$\mathbf{P}(\omega) = 2\kappa\sqrt{2\pi}\tilde{\mathbf{G}}(\omega)\tilde{\mathbf{G}}^\top(-\omega).$$

Finally, by virtue of the specific choice of external input to the  $j$ -th element of the activity variable, the power spectrum of  $i$ -th element just depends on one matrix component of the matrix Green's function by

$$P_i(\omega) = 2\kappa\sqrt{2\pi} \left| \tilde{G}_{i,j}(\omega) \right|^2. \quad (6)$$
