# Supplementary material for: Anesthetic action on the transmission delay between cortex and thalamus explains the beta-buzz observed under propofol anesthesia
Source: PubMed Central journal article supplement (PMC5473556; doi:10.1371/journal.pone.0179286), 2017-06-16
Supplement: pone.0179286.s005.pdf [file pone.0179286.s005.pdf]

### S3 Appendix. Finding the system characteristic roots.

In order to obtain numerically the roots of characteristic equation given by

$$\det(\lambda \mathbf{I} - \mathbf{A} - \mathbf{B}e^{-\lambda\tau}) = 0,$$

where  $\mathbf{A}$  and  $\mathbf{B}$  are constant quadratic matrices of order  $N$ , and  $\mathbf{I}$  is an  $N \times N$  identity matrix, we have used the spectral discretization approach known as discretization of the PDE-representation of DDEs [1, 2]. In this method, the solutions of a transcendental equation coincide with the spectrum of an operator, the so-called infinitesimal generator. The discretization scheme based on Chebyshev nodes can be implemented in three lines of MATLAB code as

```
Nod=100; N=length(A);  
D=-cheb(Nod-1)*2/tau;  
lambda=eig([kron(D(1:Nod-1,:), eye(N)); [B, zeros(N, (Nod-2)*N), A]])
```

where "Nod" denotes the discretization nodes. The code above uses the function `cheb.m`, which returns a Chebyshev differentiation matrix. This function is publicly available in Ref.[3].

## References

- [1] A. Bellen, S. Maset, Numerical solution of constant coefficient linear delay differential equations as abstract cauchy problems, *Numer. Math* 84 (2000) 351–374.
- [2] D. Breda, S. Maset, R. Vermiglio, Pseudospectral approximation of eigenvalues of derivative operators with non-local boundary conditions, *Appl. Numer. Math.* 27 (1) (2006) 318–331.
- [3] L. N. Trefethen, *Spectral Methods in MATLAB*, Oxford Univ., Oxford, UK, 2000.
